# Supplementary material
Source: HighWire-hosted journal article supplement (https://www.jneurosci.org/highwire/filestream/600580/field_highwire_adjunct_files/0/Supplemental_Material.pdf)

## **SUPPLEMENTAL FIGURE LEGENDS**

### **Supplemental Figure S1. Example of loss of Calbindin expression in a PV hole.**

(A-C) Example of Cb cell loss in a PV hole from the cis-only brain. Scale bar, 500  $\mu\text{m}$ .

### **Supplemental Figure S2. Comparable distribution and size of PV holes in young, adult and aged cis-only cortex.**

(A) “Heat map” distribution of PV holes in flattened maps of young (P35) and aged (>12 months) cis-only cortex. The number of hemispheres used is indicated.

(B) Average PV hole volume in young (P35), adult (3-7 months) and aged (>12 months) cis-only cortex. Number of PV holes is indicated in parentheses.

### **Supplemental Figure S3. Loss of Gad67-GFP and Lhx6 expressing cells in PV holes of the cis-only cortex.**

(A) Example of Gad67-GFP cell loss in a PV hole from the cis-only brain. Scale bar, 200  $\mu\text{m}$ .

(B) Example of Lhx6 cell loss in a PV hole from the cis-only brain. Scale bar, 200  $\mu\text{m}$ .

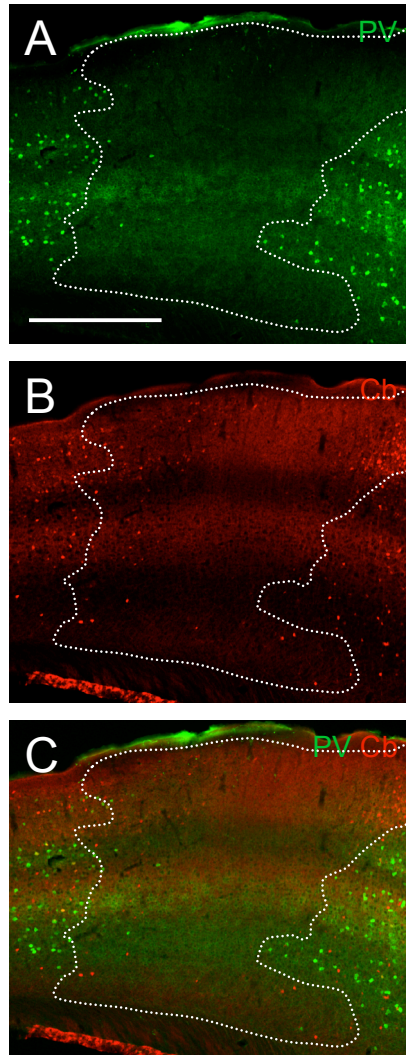

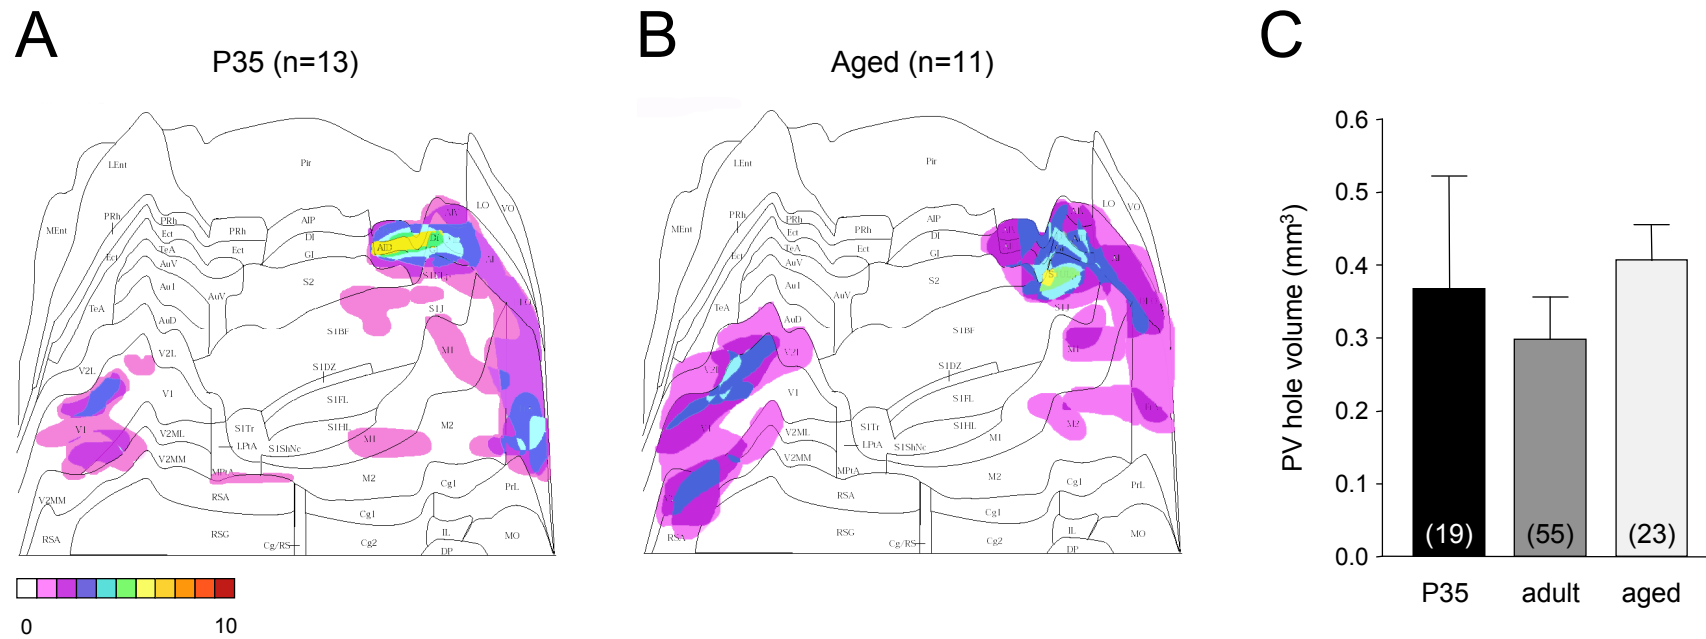

A

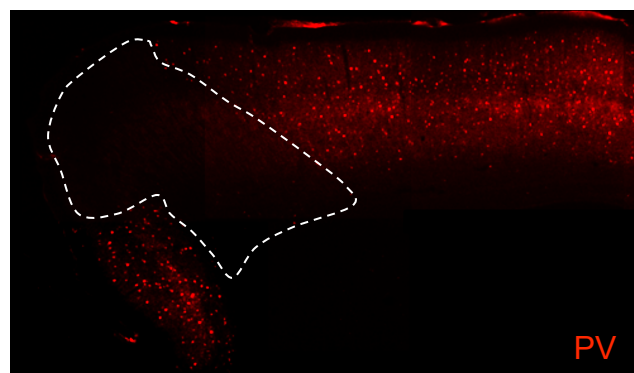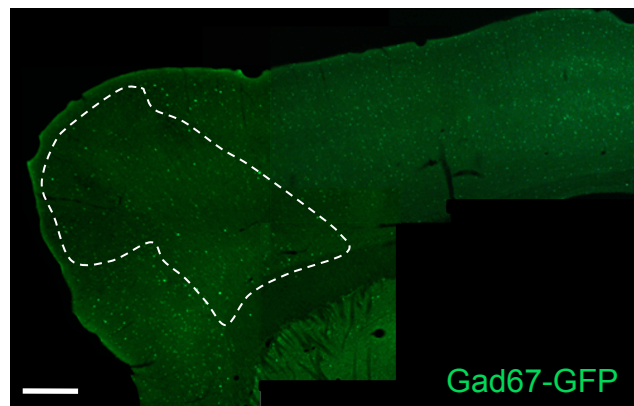

B

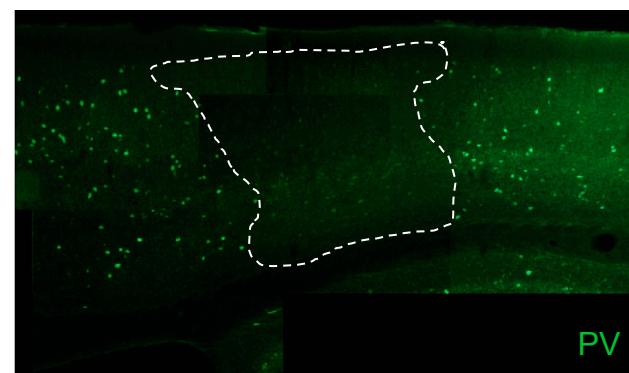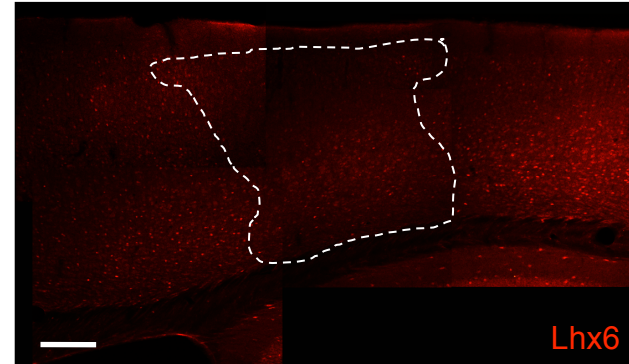

Supplement: Supplemental_Material.pdf [file Supplemental_Material.pdf]
